One may always have differences of opinion about specific items, and no author should be criticized simply because the reviewer doesn't agree with him. For example, using water-alcohol mixtures for cooling is a procedure long since abandoned by us, since water alone, properly used, is just as effective and far less dangerous. Also, the term "respirator lung" in itself has no real meaning. On the basis of present-day understanding of what goes on in the lungs of patients on respirators, this reviewer also takes issue with the use of heated nebulizers, which he considers both dangerous and unnecessary. The section on nebulization leaves much to be desired.

In summary, this is an excellent text for the expert familiar with the field, and may be useful for persons at the resident level. It would appear to be of limited usefulness for others, such as nurses, physician assistants, or technicians.

KENNETH D. HALL, M.D.  
Duke University Medical Center  
Durham, North Carolina 27710

## Books Reviewed

From time to time we shall publish a list of books received. A number but not all of these volumes will subsequently be reviewed. It is hoped that this listing will serve as a reference source for anesthesia and related literature.—M.H.H.

- Anaesthesiologie und Wiederbelebung.** By SCHREIBER. Heidelberg, Springer-Verlag, 1972. The Rising Cost of Hospital Care. By M. S. FELDSTEIN. Washington, D. C., Information Resources Press, 1971. Pp. 88, illus. \$4.25.
- Fundamentals of Drug Metabolism and Drug Disposition.** By B. N. LA RUE, H. G. MANDEL, AND E. L. WAY. Baltimore, The Williams & Wilkins Company, 1971. Pp. 415, illus. \$19.75.
- Septic Shock in Man.** Edited by S. G. HERSHEY, L. R. M. DEL GUERCIO, AND RITA MCCONN. Boston, Little, Brown and Company, 1971. Pp. 313, illus. \$10.00.
- Respiratory Physiology.** Second edition. By N. B. SLONIM AND L. H. HAMILTON. St. Louis, The C. V. Mosby Company, 1971. Pp. 229, illus. \$10.75.
- General Anesthesia.** Third edition. Volume 1. Basic Sciences. Edited by T. C. GRAY AND J. F. NUNN. New York, Appleton-Century-Crofts, 1972. Pp. 736, illus. \$95.00 per set (2 vols.).
- General Anesthesia.** Third edition. Volume 2. Clinical Practice. Edited by T. C. GRAY AND J. F. NUNN. New York, Appleton-Century-Crofts, 1972. Pp. 773, illus. \$95.00 per set (2 vols.).

**The Relaxed Patient: A Manual of Sedative Techniques.** By G. BAILEYSON. Philadelphia, J. B. Lippincott Company, 1972. Pp. 200, 79 illus. \$16.00.

**Sedation, Local and General Anesthesia in Dentistry.** Second edition. By N. B. JORGENSEN AND J. HAYDEN, JR. Philadelphia, Lea & Febiger, 1972. Pp. 163, 127 illus. \$9.50.

**Clinical Pharmacology: Basic Principles in Therapeutics.** Edited by K. L. MELMON AND H. F. MORRELLI. New York, The Macmillan Company, 1972. Pp. 718, illus. \$16.00.

**Cellular Biology and Toxicity of Anesthetics.** Edited by B. R. FINK. Baltimore, The Williams & Wilkins Company, 1972. Pp. 328, illus. \$20.50.

**Special Problems of Anesthesia in Infants.** By Z. RONDIO. Warsaw, PZWL—Polish Medical Publishers, 1971. Pp. 147, 39 illus. \$4.75.

**General Anesthetic and Sedation Techniques for Dentistry.** By W. J. FRYON, A. D. MACALISTER. Baltimore, The Williams & Wilkins Company, 1971. Pp. 144, 56 illus. \$11.50.

**Anaesthesiologie und Resuscitation: Intensivbehandlung und Ihre Grenzen.** Volume 55. By K. HUTSCHENREUTER, K. WIEMERS. Berlin-West, Springer-Verlag, 1971. Pp. 128, 28 illus. \$6.70.

**Clinical Anesthesia, Legal Aspects of Anesthesia.** Volume 8. Edited by W. H. L. DORNETTE. Philadelphia, F. A. Davis Company, 1972. Pp. 614, 30 illus. \$23.00.

**Care of the Critically Ill Child.** By R. S. JONES AND J. B. OWEN-THOMAS. Baltimore, The Williams & Wilkins Company, 1971. Pp. 323, illus. \$20.75.

**Hemodilution: Theoretical Basis and Clinical Application.** Proceedings of an International Symposium—Rottach-Egern, Tegernsee, Germany, Oct. 3-6, 1971. Edited by K. MESSMER, H. SCHMID-SCHONBEIN. Basel, S. Karger AG, 1972. Pp. 332, 133 illus. \$19.60.

**Manual of Surgical Therapeutics.** Second edition. Edited by R. E. CONDON AND L. M. NYHUS. Boston, Little, Brown and Company, 1972. Pp. 400, 13 illus. \$7.50.

**The Anesthesiologist and the Surgeon: Partners in the Operating Room.** By J. P. BUNKER. Boston, Little, Brown and Company, 1972. Pp. 180. \$8.95.

**Respiration in Health and Disease.** Second edition. By R. M. CHERNIACK, L. CHERNIACK, AND A. NAIMARK. Philadelphia, W. B. Saunders Company, 1972. Pp. 496, 115 illus. \$14.50.

**Physics Applied to Anesthesia.** Second edition. By D. W. HILL. New York, Appleton-Century-Crofts, 1972. Pp. 304, illus. \$12.75.
